# Supplementary material
Source: PubMed Central journal article supplement (PMC3686845)

Amplification Plot

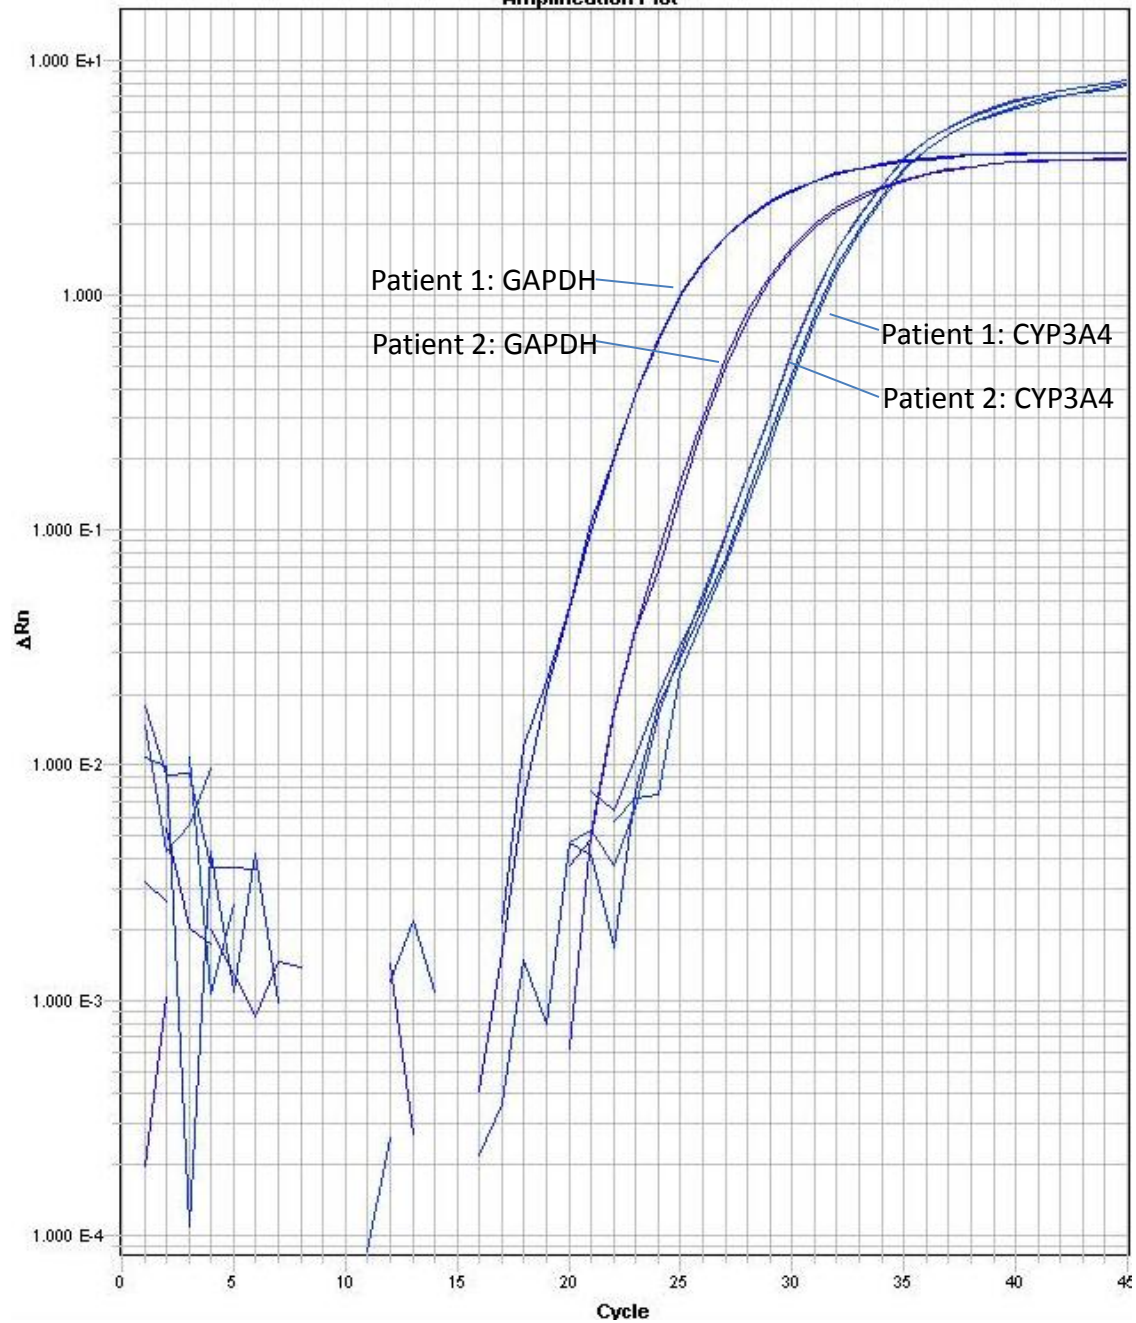

Supplement: NIHMS474875-supplement-1.pdf [file NIHMS474875-supplement-1.pdf]
